# Supplementary material for: Self-DNA Early Exposure in Cultivated and Weedy Setaria Triggers ROS Degradation Signaling Pathways and Root Growth Inhibition
Source: MDPI journal article supplement (doi:10.3390/plants12061288), 2023-03-13

## Supplementary Materials

**Supplementary Table S1.** Primers used in real-time qPCR analysis. For each source gene, the Phytozome ID, strand and position on the genome are shown, with the forward and reverse primer sequences and either the reference paper for the primer, or the reference tool used to design it.

| Source Gene                 | Phytozome ID and position                                       | Primer (5'-3')                                                 | Reference/Tool                       |
|-----------------------------|-----------------------------------------------------------------|----------------------------------------------------------------|--------------------------------------|
| <i>FSD2</i>                 | Seita.4G031200<br>plus strand<br>Scaffold_4:2020702..2023953    | Fwd: TGGTTGGGTTTGGCTTGTCTTG<br>Rev: TGTCCCAAGAGATGAGATGGTCCA   | (Primer3web<br>v.4.1.0)              |
| <i>ALDH22A1</i>             | Seita.2G440100<br>minus strand<br>Scaffold_2:48874364..48880144 | Fwd: CAAGAAGAGGCATTGACAC<br>Rev: TTGATTGCTGCTACACACAG          | (Zhu <i>et al.</i> , 2014<br>[49])   |
| <i>ALDH7B1</i>              | Seita.2G218400<br>minus strand<br>Scaffold_2:32046039..32052337 | Fwd: TCTGCGGAACTGTGTTGTC<br>Rev: TGAACCATTAGACCAGCCCT          | (Zhu <i>et al.</i> , 2014<br>[49])   |
| <i>CSD3</i>                 | Seita.9G403600<br>minus strand<br>Scaffold_9:46291516..46295065 | Fwd: CTCAAGCCTGGCCTCCACGG<br>Rev: CAGTGGGATCTGGCTGTCGGT        | (Primer3web<br>v.4.1.0)              |
| <i>WD40-144</i>             | Seita.6G076200<br>minus strand<br>Scaffold_6:6733603..6739573   | Fwd: TACCATCTCGCACGCTACAGGTTT<br>Rev: TCCATGCAACCATCATCACCAGCT | (Primer3web<br>v.4.1.0)              |
| <i>WD40-155</i>             | Seita.6G247500<br>minus strand<br>Scaffold_6:35501203..35506269 | Fwd: TCAAGGAGGAGAACGAGGTGCAC<br>Rev: GCAGCGCCATAACCCTCACCA     | (Primer3web<br>v.4.1.0)              |
| <i>MPK17</i>                | Seita.4G273900<br>plus strand<br>Scaffold_4:39101196..39106532  | Fwd: CGAGAGCCACAGGAAGAACTCAGT<br>Rev: CCTGTGCGGGTATCTACTGCTGC  | (Primer3web<br>v.4.1.0)              |
| RNA<br><i>Polymerase II</i> | Seita.2G142700<br>plus strand<br>Scaffold_2:17011362..17018255  | Fwd: TAGGAAAGGAATTGGCAAGG<br>Rev: TAGGACTGCTTTCGACCCA          | (Kumar <i>et al.</i> ,<br>2013 [55]) |

**Supplementary Table S2.** Results of the cross-factorial experiment. Data refer to the inhibition tests on root elongation of the two *Setaria* species exposed to purified extracellular DNA solutions at different concentrations and from different sources. For each treatment combination (target species, DNA source and DNA concentration) mean and standard deviation of root elongation (expressed as percentage of the control) are shown. Different small letters in brackets indicate significant differences among combinations of target species and DNA source within each concentration level (i.e. table column, see also lettering in Figure 1 in main text), whereas different capital letters in brackets indicate significant differences among combinations of DNA source and concentration within each target species (table blocks). All pairwise comparisons were tested with Tukey's post hoc test ( $\alpha = 0.05$ ). Asterisks indicate means significantly different from the control (one-sample t test with Bonferroni's correction for multiple comparisons). The symbol § indicates borderline p-values ( $0.002 < P < 0.05$ ) in the treatment vs. control tests.

| Target Species    | DNA source        | DNA Concentration (ng/ $\mu$ l) |                             |                             |
|-------------------|-------------------|---------------------------------|-----------------------------|-----------------------------|
|                   |                   | 2                               | 10                          | 50                          |
| <i>S. italica</i> | <i>S. italica</i> | 58.47 $\pm$ 3.20 (a, CD) *      | 27.44 $\pm$ 2.53 (a, AB) *  | 14.91 $\pm$ 3.06 (a, A) *   |
|                   | <i>S. pumila</i>  | 93.18 $\pm$ 8.93 (b, F)         | 72.68 $\pm$ 6.38 (bc, DE) § | 46.06 $\pm$ 4.23 (b, BC) *  |
|                   | <i>B. napus</i>   | 89.68 $\pm$ 7.45 (b, EF)        | 68.81 $\pm$ 2.67 (bc, D) §  | 67.91 $\pm$ 7.69 (c, D) §   |
|                   | <i>S. salar</i>   | 104.48 $\pm$ 7.88 (b, F)        | 98.45 $\pm$ 2.84 (d, F)     | 95.81 $\pm$ 7.88 (d, F)     |
| <i>S. pumila</i>  | <i>S. italica</i> | 104.98 $\pm$ 7.20 (b, F)        | 87.99 $\pm$ 5.00 (cd, EF) § | 50.26 $\pm$ 4.29 (bc, BC) * |
|                   | <i>S. pumila</i>  | 70.08 $\pm$ 6.88 (a, DE) §      | 39.63 $\pm$ 6.89 (a, AB) *  | 24.64 $\pm$ 3.95 (a, A) *   |
|                   | <i>B. napus</i>   | 105.68 $\pm$ 6.41 (b, F)        | 68.32 $\pm$ 6.17 (bc, CD) § | 63.88 $\pm$ 9.46 (bc, CD) § |
|                   | <i>S. salar</i>   | 104.42 $\pm$ 5.75 (b, F)        | 97.57 $\pm$ 3.12 (d, F)     | 92.15 $\pm$ 6.41 (d, F)     |

**Supplementary Table S3.** Results of the real-time qPCR test on *S. italica* and *S. pumila* exposed to self-DNA. Data refer to mean and standard deviation of  $\Delta C_q$  calculated over 3 biological replicates for each species, target gene and exposure time. Mean and standard deviation of  $\Delta C_q$  observed in the unexposed controls are also shown. Different letters indicate significant differences between 1 h and 3 h  $\Delta C_q$  for each species and gene, as resulting from two-independent-sample t test with Bonferroni's correction for multiple comparisons. Asterisks indicate means significantly different from control (two-independent-sample t test with Bonferroni's correction). The symbol § indicates borderline P-values ( $0.00238 < P < 0.05$ ) in the treatment vs. control comparisons.

| Species           | Target Gene | 1h                   | 3h                   | Control        |
|-------------------|-------------|----------------------|----------------------|----------------|
| <i>S. italica</i> | SiFSD2      | 1.259 ± 0.169 *      | 1.380 ± 0.133 *      | 2.464 ± 0.103  |
|                   | ALDH22A1    | -0.938 ± 0.148 *     | -0.778 ± 0.104 *     | -0.131 ± 0.156 |
|                   | ALDH7B1     | -1.855 ± 0.197       | -1.740 ± 0.119       | -1.685 ± 0.194 |
|                   | CSD3        | -3.807 ± 0.203       | -3.885 ± 0.156       | -3.507 ± 0.193 |
|                   | WD40-144    | -0.867 ± 0.073       | -0.523 ± 0.073 §     | -0.954 ± 0.127 |
|                   | WD40-155    | 1.495 ± 0.068 *      | 1.795 ± 0.102 *      | -0.562 ± 0.116 |
|                   | MPK17-1     | -0.374 ± 0.127 (a) § | 0.990 ± 0.094 (b) *  | 0.018 ± 0.156  |
| <i>S. pumila</i>  | SiFSD2      | 1.782 ± 0.191 *      | 1.495 ± 0.123 *      | 3.060 ± 0.194  |
|                   | ALDH22A1    | -1.533 ± 0.169 *     | -1.189 ± 0.170 §     | -0.631 ± 0.088 |
|                   | ALDH7B1     | -1.112 ± 0.182       | -1.053 ± 0.156       | -0.931 ± 0.165 |
|                   | CSD3        | -4.851 ± 0.027 (a) * | -5.332 ± 0.106 (b) * | -4.427 ± 0.115 |
|                   | WD40-144    | -0.810 ± 0.127       | -0.769 ± 0.130 §     | -1.040 ± 0.131 |
|                   | WD40-155    | 1.575 ± 0.084 (a) *  | 2.165 ± 0.085 (b) *  | 0.069 ± 0.173  |
|                   | MPK17-1     | -0.063 ± 0.150 (a) * | 1.474 ± 0.184 (b) *  | 0.639 ± 0.168  |

**Supplementary Figure S1.** Interaction plot for the term  $S \times D$  of the ANOVA model presented in Table 1 in main text.

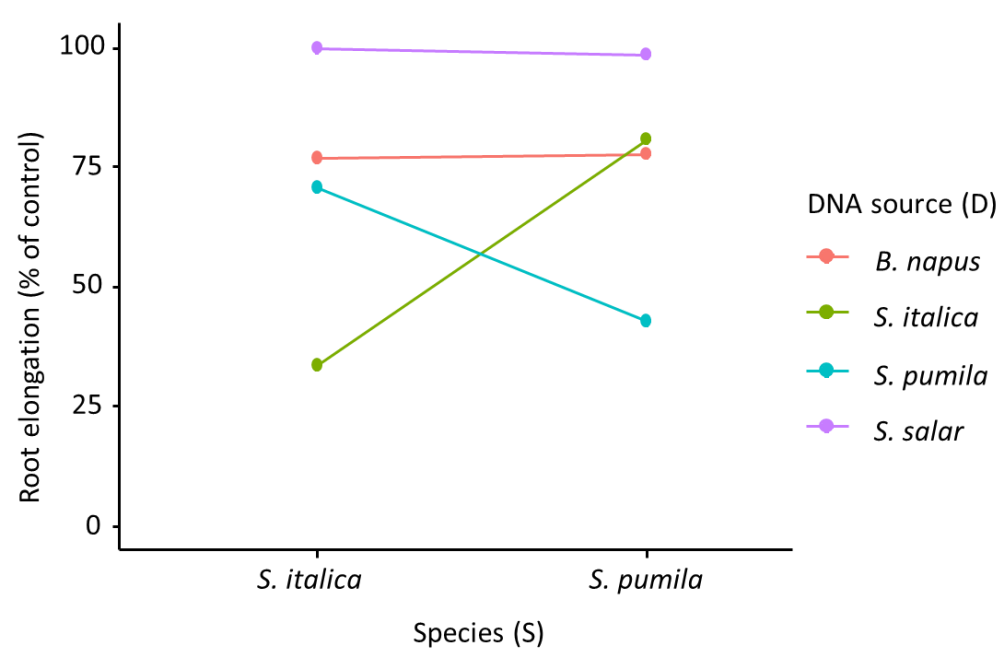

**Supplementary Figure S2.** Interaction plot for the term  $D \times C$  of the ANOVA model presented in Table 1 in main text.

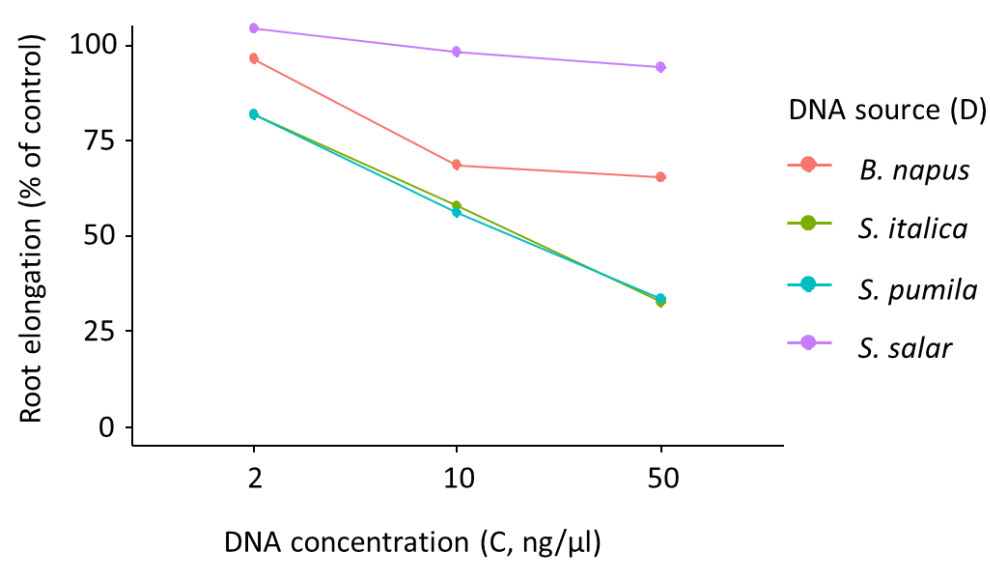

Supplement: s1 [file s1]
